# Supplementary material for: Janus nanostructures formed by mesoporous silica coating Au nanorods for near-infrared chemo–photothermal therapy
Source: Royal Society of Chemistry journal article supplement (doi:10.1039/c7tb02144e), 2017-01-01
Supplement: c7tb02144e1.pdf [file c7tb02144e1.pdf]

## Supporting Information

### **Janus nanostructures formed by mesoporous silica coating Au nanorods for near-infrared chemo-photothermal therapy**

Lin Fang,<sup>a</sup> Weiqi Wang,<sup>b</sup> Yang Liu,<sup>a</sup> Zhigang Xie<sup>b</sup>, and Li Chen<sup>a\*</sup>

a. Department of Chemistry, Northeast Normal University, 5268 Remin Street, Changchun 130024, P. R. China, E-mail: chenl686@nenu.edu.cn

b. State Key Laboratory of Polymer Physics and Chemistry, Changchun Institute of Applied Chemistry, Chinese Academy of Sciences, 5625 Renmin Street, Changchun 130022, P. R. China. E-mail: xiez@ciac.ac.cn

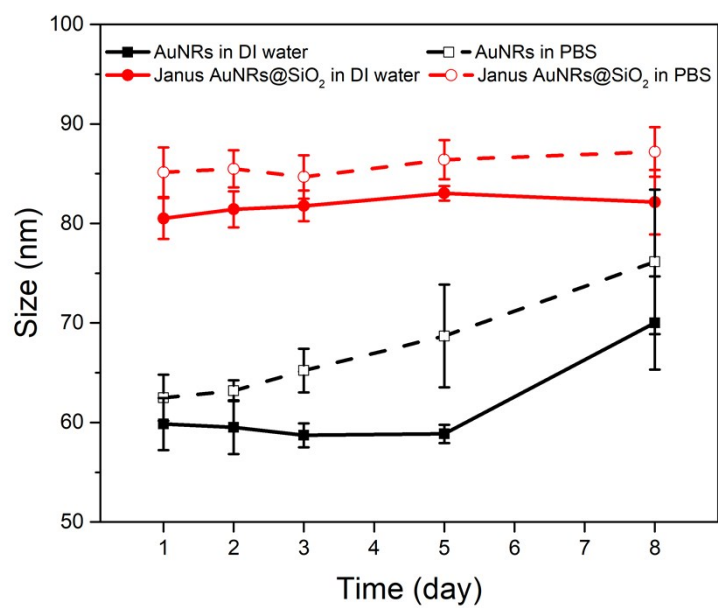

Figure S1. The dimensional change of AuNRs and Janus AuNRs@mSiO<sub>2</sub> in 8 days.

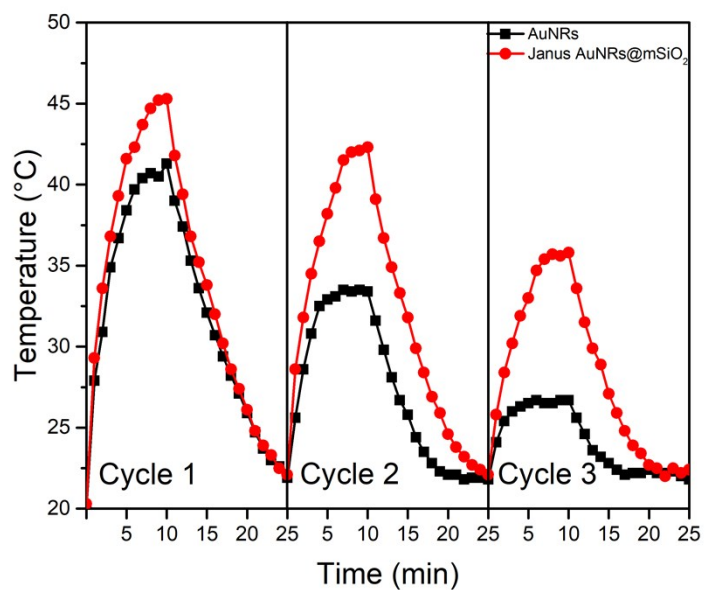

Figure S2. The photothermal cycling tests of AuNRs and Janus AuNRs@mSiO<sub>2</sub> (808 nm, 2 W cm<sup>-2</sup>).

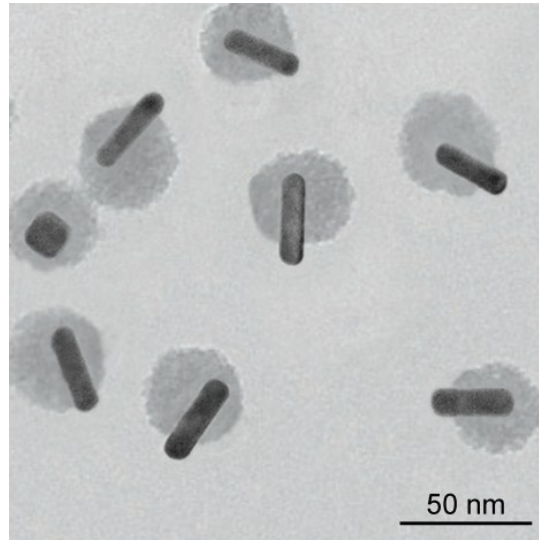

Figure S3. TEM images of Janus AuNRs@mSiO<sub>2</sub> after NIR illumination.

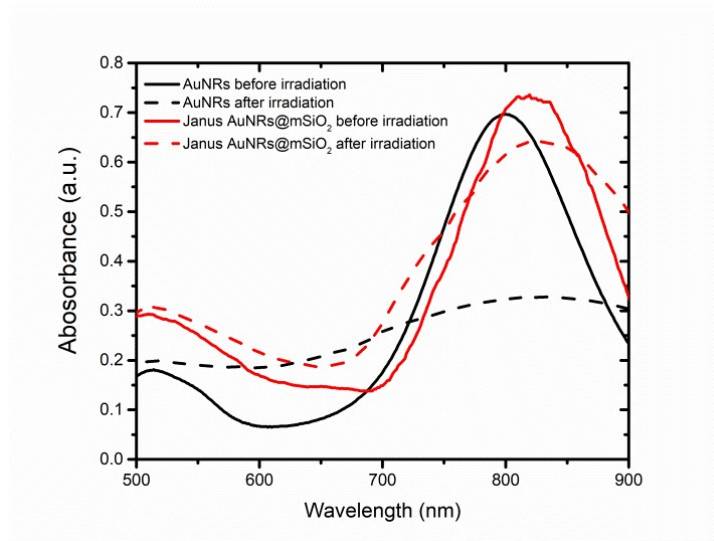

Figure S4. The UV-Vis absorption spectra of AuNRs and Janus AuNRs@mSiO<sub>2</sub> before and after three times photothermal cycling.

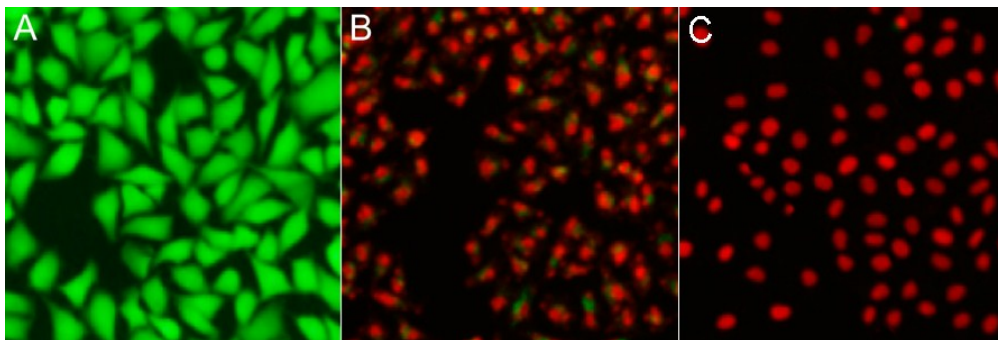

Figure S5. Fluorescence microscope images of calcein AM (green, live cells) and propidium iodide (red, dead cells) cocultured HeLa cells treated with (A) only irradiation, (B) AuNRs with irradiation, and (C) Janus AuNRs@mSiO<sub>2</sub> with irradiation.
